# Supplementary material for: Assessing the role of tumour-associated macrophage subsets in breast cancer subtypes using digital image analysis
Source: PubMed Central journal article supplement (PMC9883348; doi:10.1007/s10549-022-06859-y), 2023-01-09
Supplement: 10549_2022_6859_MOESM1_ESM.pdf [file 10549_2022_6859_MOESM1_ESM.pdf]

## **Assessing the role of tumour-associated macrophage subsets in breast cancer subtypes using digital image analysis**

Breast Cancer Research and Treatment

Mieke C Zwager, Rico Bense, Stijn Waaijer, Si-Qi Qiu, Hetty Timmer-Bosscha, Elisabeth GE de Vries, Carolien P Schröder, Bert van der Vegt

### **Corresponding author**

B. van der Vegt, MD, PhD,

University of Groningen, University Medical Center Groningen

Department of Pathology and Medical Biology

PO Box 30001, 9700 RB Groningen.

Telephone: +31503615272

E-mail: [b.van.der.vegt@umcg.nl](mailto:b.van.der.vegt@umcg.nl)

## Supplementary data

**Supplementary Table 1. Univariate analysis of DFS and OS of the total study cohort**

|                                  | DFS   |             |          | OS    |             |          |
|----------------------------------|-------|-------------|----------|-------|-------------|----------|
|                                  | HR    | 95% CI      | <i>P</i> | HR    | 95% CI      | <i>P</i> |
| <b>CD68</b>                      | 0.999 | 0.997-1.001 | 0.162    | 0.998 | 0.996-1.000 | 0.067    |
| <sup>CD163</sup> <b>M2-like</b>  | 0.999 | 0.998-1.001 | 0.304    | 0.999 | 0.998-1.000 | 0.160    |
| <sup>CD163</sup> <b>M1-like</b>  | 0.997 | 0.989-1.004 | 0.360    | 0.995 | 0.986-1.004 | 0.288    |
| <sup>CD163</sup> <b>ratio</b>    | 1.000 | 0.999-1.001 | 0.624    | 0.999 | 0.998-1.001 | 0.380    |
| <sup>CSF-1R</sup> <b>M2-like</b> | 1.000 | 0.999-1.001 | 0.774    | 1.000 | 0.999-1.001 | 0.649    |
| <sup>CSF-1R</sup> <b>M1-like</b> | 0.999 | 0.996-1.001 | 0.295    | 0.997 | 0.993-1.000 | 0.084    |
| <sup>CSF-1R</sup> <b>ratio</b>   | 1.000 | 0.999-1.001 | 0.747    | 1.000 | 0.999-1.001 | 0.519    |
| <sup>CD206</sup> <b>M2-like</b>  | 1.001 | 0.999-1.002 | 0.501    | 1.000 | 0.998-1.002 | 0.763    |
| <sup>CD206</sup> <b>M1-like</b>  | 0.998 | 0.996-1.001 | 0.185    | 0.998 | 0.995-1.001 | 0.121    |
| <sup>CD206</sup> <b>ratio</b>    | 1.001 | 0.999-1.002 | 0.334    | 1.001 | 0.999-1.002 | 0.335    |

HR, hazard ratio; 95% CI, 95% confidence interval; *P*, *P*-value.

**Supplementary Table 2. Univariate analysis of DFS and OS in Luminal-A breast cancer**

|                                  | DFS   |             |          | OS    |             |          |
|----------------------------------|-------|-------------|----------|-------|-------------|----------|
|                                  | HR    | 95% CI      | <i>P</i> | HR    | 95% CI      | <i>P</i> |
| <b>CD68</b>                      | 1.000 | 0.997-1.003 | 0.922    | 0.999 | 0.995-1.003 | 0.693    |
| <sup>CD163</sup> <b>M2-like</b>  | 1.000 | 0.998-1.002 | 0.715    | 0.999 | 0.996-1.001 | 0.392    |
| <sup>CD163</sup> <b>M1-like</b>  | 0.995 | 0.984-1.005 | 0.330    | 0.994 | 0.981-1.008 | 0.407    |
| <sup>CD163</sup> <b>ratio</b>    | 1.000 | 0.998-1.002 | 0.830    | 0.999 | 0.997-1.002 | 0.555    |
| <sup>CSF-1R</sup> <b>M2-like</b> | 0.999 | 0.995-1.003 | 0.507    | 0.996 | 0.989-1.002 | 0.158    |
| <sup>CSF-1R</sup> <b>M1-like</b> | 1.000 | 0.996-1.004 | 0.966    | 1.000 | 0.996-1.005 | 0.860    |
| <sup>CSF-1R</sup> <b>ratio</b>   | 0.998 | 0.994-1.003 | 0.482    | 0.996 | 0.989-1.003 | 0.241    |
| <sup>CD206</sup> <b>M2-like</b>  | 1.000 | 0.998-1.003 | 0.767    | 1.000 | 0.997-1.002 | 0.756    |
| <sup>CD206</sup> <b>M1-like</b>  | 1.000 | 0.995-1.005 | 0.945    | 0.999 | 0.993-1.005 | 0.761    |
| <sup>CD206</sup> <b>ratio</b>    | 1.001 | 0.999-1.003 | 0.573    | 1.000 | 0.998-1.002 | 0.895    |

HR, hazard ratio; 95% CI, 95% confidence interval; *P*, *P*-value.

**Supplementary Table 3. Univariate analysis of DFS and OS in Luminal-B breast cancer**

|                                  | DFS   |             |          | OS    |             |          |
|----------------------------------|-------|-------------|----------|-------|-------------|----------|
|                                  | HR    | 95% CI      | <i>P</i> | HR    | 95% CI      | <i>P</i> |
| <b>CD68</b>                      | 0.999 | 0.995-1.003 | 0.709    | 0.998 | 0.994-1.004 | 0.744    |
| <sup>CD163</sup> <b>M2-like</b>  | 0.998 | 0.995-1.001 | 0.294    | 0.999 | 0.995-1.002 | 0.437    |
| <sup>CD163</sup> <b>M1-like</b>  | 1.003 | 0.991-1.015 | 0.623    | 1.000 | 0.984-1.017 | 0.980    |
| <sup>CD163</sup> <b>ratio</b>    | 0.998 | 0.996-1.001 | 0.308    | 0.999 | 0.995-1.002 | 0.460    |
| <sup>CSF-1R</sup> <b>M2-like</b> | 0.999 | 0.997-1.002 | 0.676    | 1.000 | 0.997-1.003 | 0.955    |
| <sup>CSF-1R</sup> <b>M1-like</b> | 0.997 | 0.989-1.006 | 0.497    | 0.997 | 0.986-1.007 | 0.530    |
| <sup>CSF-1R</sup> <b>ratio</b>   | 0.998 | 0.993-1.002 | 0.327    | 0.999 | 0.995-1.003 | 0.679    |
| <sup>CD206</sup> <b>M2-like</b>  | 1.000 | 0.995-1.005 | 0.980    | 1.000 | 0.993-1.007 | 0.811    |
| <sup>CD206</sup> <b>M1-like</b>  | 0.999 | 0.994-1.004 | 0.749    | 0.998 | 0.992-1.004 | 0.549    |
| <sup>CD206</sup> <b>ratio</b>    | 0.998 | 0.992-1.005 | 0.642    | 0.998 | 0.990-1.007 | 0.700    |

HR, hazard ratio; 95% CI, 95% confidence interval; *P*, *P*-value.

**Supplementary Table 4. Univariate analysis of DFS and OS in HER2-positive breast cancer**

|                                  | DFS   |             |          | OS    |             |          |
|----------------------------------|-------|-------------|----------|-------|-------------|----------|
|                                  | HR    | 95% CI      | <i>P</i> | HR    | 95% CI      | <i>P</i> |
| <b>CD68</b>                      | 0.999 | 0.994-1.004 | 0.697    | 0.999 | 0.994-1.004 | 0.787    |
| <sup>CD163</sup> <b>M2-like</b>  | 1.000 | 0.997-1.004 | 0.834    | 1.001 | 0.998-1.005 | 0.462    |
| <sup>CD163</sup> <b>M1-like</b>  | 0.973 | 0.921-1.027 | 0.322    | 0.938 | 0.798-1.103 | 0.438    |
| <sup>CD163</sup> <b>ratio</b>    | 1.001 | 0.998-1.004 | 0.483    | 1.002 | 0.999-1.005 | 0.261    |
| <sup>CSF-1R</sup> <b>M2-like</b> | 0.999 | 0.995-1.003 | 0.599    | 1.000 | 0.996-1.004 | 0.957    |
| <sup>CSF-1R</sup> <b>M1-like</b> | 0.999 | 0.992-1.006 | 0.816    | 0.995 | 0.985-1.005 | 0.367    |
| <sup>CSF-1R</sup> <b>ratio</b>   | 0.998 | 0.994-1.003 | 0.477    | 0.999 | 0.995-1.003 | 0.738    |
| <sup>CD206</sup> <b>M2-like</b>  | 0.996 | 0.986-1.007 | 0.494    | 0.996 | 0.985-1.008 | 0.550    |
| <sup>CD206</sup> <b>M1-like</b>  | 1.001 | 0.995-1.006 | 0.792    | 1.001 | 0.995-1.007 | 0.723    |
| <sup>CD206</sup> <b>ratio</b>    | 1.002 | 0.991-1.013 | 0.746    | 1.002 | 0.991-1.014 | 0.666    |

HR, hazard ratio; 95% CI, 95% confidence interval; *P*, *P*-value.

**Supplementary Table 5. Univariate analysis of DFS and OS in TNBC**

|                                  | DFS   |             |          | OS    |             |          |
|----------------------------------|-------|-------------|----------|-------|-------------|----------|
|                                  | HR    | 95% CI      | <i>P</i> | HR    | 95% CI      | <i>P</i> |
| <b>CD68</b>                      | 0.999 | 0.995-1.003 | 0.562    | 0.997 | 0.993-1.002 | 0.248    |
| <sup>CD163</sup> <b>M2-like</b>  | 1.000 | 0.999-1.002 | 0.690    | 0.999 | 0.997-1.001 | 0.418    |
| <sup>CD163</sup> <b>M1-like</b>  | 1.005 | 0.989-1.023 | 0.526    | 1.008 | 0.991-1.025 | 0.378    |
| <sup>CD163</sup> <b>ratio</b>    | 1.001 | 0.999-1.002 | 0.523    | 0.999 | 0.997-1.001 | 0.499    |
| <sup>CSF-1R</sup> <b>M2-like</b> | 1.000 | 0.999-1.001 | 0.752    | 1.000 | 0.999-1.001 | 0.566    |
| <sup>CSF-1R</sup> <b>M1-like</b> | 0.999 | 0.994-1.003 | 0.575    | 0.994 | 0.985-1.004 | 0.247    |
| <sup>CSF-1R</sup> <b>ratio</b>   | 1.000 | 0.999-1.001 | 0.688    | 1.000 | 0.999-1.001 | 0.496    |
| <sup>CD206</sup> <b>M2-like</b>  | 1.001 | 0.998-1.003 | 0.540    | 1.001 | 0.998-1.003 | 0.516    |
| <sup>CD206</sup> <b>M1-like</b>  | 0.998 | 0.993-1.003 | 0.393    | 0.995 | 0.988-1.003 | 0.218    |
| <sup>CD206</sup> <b>ratio</b>    | 1.000 | 0.998-1.003 | 0.681    | 1.001 | 0.999-1.003 | 0.488    |

HR, hazard ratio; 95% CI, 95% confidence interval; *P*, *P*-value.
